# Supplementary material for: Preclinical Atherosclerosis and Prediabetes: A Cross-Sectional Metabolic Assessment In Apparently Healthy Population
Source: Research Square preprint supplement (doi:10.21203/rs.3.rs-6658392/v1), 2025-05-20
Supplement: Supplementary file 1 [file d46f88e3f400beebb58d7cf9.xlsx]

## Sheet: Table 1
Supplementary Table 1 The characteristic of study sample according to prediabetes and atherosclerosis status.
Variable	Atherosclerosis	Prediabetes	n valid	Mean	Std.Dev	Min	Q1	Median	Q3	Max	p*	p**
												1 vs 2	1 vs 3	1 vs 4	2 vs 3	2 vs 4	3 vs 4
Age, years	-	-	198	35.66	8.6	20	29	35	42	58	8.7232e-25	0.00011007	8.60957e-11	0	0.00104359	1.92091e-10	0.151486
	-	+	139	39.71	8.51	20	34	39	45	64
	+	-	48	45.04	8.09	30	39	46	51.5	61
	+	+	62	48.47	8.07	32	42	50	54	63
Fasting glucose concentration, mg/dl	-	-	198	90.67	5.66	68.2	87	91	95	99	6.22709e-61	0	0.166564	0	0	0.284641	0
glucose_0	-	+	139	102.59	7.3	81	100	102	106	128
glucose_0	+	-	48	92.81	5.32	78	88.5	94	97	99.5
glucose_0	+	+	62	104.34	7.41	87	100	103.5	108	130
Glucose concentration after 1 h, mg/dl	-	-	191	119.98	29.52	57	98	118	137	210	6.88694e-23	0	0.956416	0	2.10649e-05	0.00754783	4.83114e-10
glucose_60	-	+	136	149.19	37.94	82	120	143	174.5	270
glucose_60	+	-	48	122.75	31.9	53	101.5	127.5	143	203
glucose_60	+	+	61	165.82	36.05	66	142	162	190	229
Glucose concentration after 2 h, mg/dl	-	-	190	103.02	18.72	43	92	104	114	139	1.8007e-22	0	0.268572	0	0.000458667	0.121042	1.61767e-06
glucose_120	-	+	138	124.48	26.9	49	106	124.5	142	190
glucose_120	+	-	48	109.56	17.81	65	99.5	111	123	138
glucose_120	+	+	61	132.08	24.41	83	118	128	144	198
Fasting inslin concentration, mU/l	-	-	198	9.53	5.54	1.93	6.23	8.4	10.61	38.23	1.06224e-05	0.00611225	0.631702	1.37046e-05	0.73627	0.129183	0.0441745
insulin_0	-	+	139	12.19	6.05	3.76	8.24	10.83	15.3	36.03
insulin_0	+	-	48	10.94	5.83	3.51	6.77	9.45	13.55	33.17
insulin_0	+	+	62	14.64	13.47	3.1	8.33	11.62	16.12	102.8
Insulin concentration after 1 h, mU/l	-	-	191	62.85	36.7	15.93	38.65	54.61	74.76	237.6	1.39745e-05	0.00370698	0.928213	4.14066e-05	0.323627	0.253546	0.017295
insulin_60	-	+	136	86.82	62.07	9.24	50.01	69.85	101.9	393.5
insulin_60	+	-	48	69.01	54.16	11.82	32.39	48.46	89.12	228
insulin_60	+	+	61	104.54	112.83	27	52.79	76.48	113.8	847.8
Insulin concentration after 2 h, mU/l	-	-	190	43.72	31.7	2.99	24.52	35.98	50.81	199.6	5.47018e-07	0.0610191	0.911143	1.77826e-07	0.728084	0.00224804	0.00113816
insulin_120	-	+	136	58.72	43.74	6.12	30.19	51.09	69.94	279
insulin_120	+	-	48	49.43	36.55	4.59	23.68	36.94	61.36	159.7
insulin_120	+	+	61	88.06	109.27	7.4	42.73	56.5	86.01	766.5
Fasting C-peptid concentration, nmol/l	-	-	198	2.02	0.68	0.98	1.59	1.87	2.31	4.95	9.80189e-09	6.67329e-06	0.0912092	3.52895e-07	0.73936	0.336103	0.119527
c_peptide_0	-	+	139	2.43	0.79	1.23	1.83	2.36	2.89	5.21
c_peptide_0	+	-	48	2.3	0.76	0.71	1.77	2.09	2.58	4.51
c_peptide_0	+	+	62	2.63	0.9	0.99	2.04	2.44	2.94	5.01
C-peptid concentration after 1 h, nmol/l	-	-	191	8.04	2.3	3.86	6.51	7.65	9.37	17.67	9.62648e-07	0.000175846	0.718124	1.13812e-05	0.271905	0.416361	0.0273851
c_peptide_60	-	+	136	9.38	3.26	3.83	7.38	8.85	10.68	22.59
c_peptide_60	+	-	48	8.52	2.95	3.41	6.18	7.9	10.16	16.75
c_peptide_60	+	+	61	10.05	3.2	4.61	8.17	9.22	11.36	20.38
C-peptid concentration after 2h, nmol/l	-	-	190	6.94	2.41	1.44	5.43	6.39	8.27	15.77	1.2066e-10	0.000441251	0.451264	5.9854e-11	0.595522	0.001296	0.000343055
c_peptide_120	-	+	136	8.24	3.09	2.85	6.08	8.12	10.08	19.35
c_peptide_120	+	-	48	7.63	2.92	2.38	5.62	6.82	9.84	14.46
c_peptide_120	+	+	61	9.9	3.73	3.96	7.49	9.03	11.37	22.28
Haemoglobin A1c, %	-	-	198	5.12	0.3	4.2	4.9	5.1	5.4	5.7	4.3079e-15	5.05975e-10	0.0635239	0	0.187576	0.111944	0.00255808
hba1c	-	+	139	5.36	0.33	4.1	5.1	5.3	5.6	6.2
hba1c	+	-	48	5.25	0.29	4.4	5.1	5.3	5.5	5.7
hba1c	+	+	62	5.47	0.34	4.6	5.3	5.5	5.7	6.1
Average Intima Media Thickening	-	-	183	0.54	0.07	0.42	0.5	0.53	0.56	0.87	1.62643e-15	0.00156758	5.71434e-08	0	0.00883792	2.03955e-05	0.764148
cca_imt_avg	-	+	129	0.57	0.07	0.43	0.52	0.57	0.62	0.78
cca_imt_avg	+	-	46	0.61	0.1	0.46	0.54	0.6	0.66	0.96
cca_imt_avg	+	+	60	0.63	0.08	0.5	0.58	0.62	0.66	0.83
Total cholesterol, mg/dl	-	-	198	179.64	29.37	117	159	177	196	286	1.1179e-07	0.000113186	0.160111	7.92813e-07	0.828808	0.197226	0.0960303
cholesterol	-	+	139	194.5	31.71	129	173	190	220	270
cholesterol	+	-	48	190.06	32.03	131	167.5	187.5	209	255
cholesterol	+	+	62	203.9	34.18	143	178	205.5	228	300
HDL-C,mg/dl	-	-	198	64.61	16.52	25.79	51.68	64.76	74.35	124	0.246773	0.999503	0.263508	0.72619	0.336092	0.799557	0.881255
hdl	-	+	139	64.41	18.15	32.1	51.32	63.32	73.62	133.59
hdl	+	-	48	59.69	14.54	31.48	49.58	58.53	68.5	103.43
hdl	+	+	62	62.08	15.92	32	51.04	60.84	71.67	102.33
LDL-C, mg/dl	-	-	198	111.18	27.19	55.6	91.7	109.15	128.5	187	4.01462e-08	0.000855827	0.0501401	7.78209e-08	0.999951	0.0314172	0.116929
ldl	-	+	139	123.29	29.81	38.44	99.6	123.3	146	188.9
ldl	+	-	48	123.05	32.61	35.4	98.15	122.55	145.75	189.6
ldl	+	+	62	135.32	27.07	73.8	114.7	137.95	157.2	187
Triglycerides, mg/dl	-	-	198	89.19	67.62	30	56	74	98	630	0.0101308	0.211597	0.0345292	0.0753106	0.546954	0.807194	0.970912
triglycerides	-	+	139	107.54	62.95	35	69	88	127	456
triglycerides	+	-	48	126.48	168.63	34	61	85	140.5	1203
triglycerides	+	+	62	119.21	85.07	43	75	94	137	603
1 - Group without prediabetes and preclinical atherosclerosis
2 - Group with prediabetes and without preclinical atherosclerosis
3 - Group without prediabetes and with preclinical atherosclerosis
4 - Group with prediabetes and preclinical atherosclerosis

## Sheet: Table 2
Supplementary Table 3 - The effects of atherosclerosis and prediabetes and their interaction status on metabolite levels – summary of the two-way ANOVA results
Metabolite	atherosclerosis status			prediabetes status			Interaction
	raw p	FDR adjusted p	Partial η²	raw p	FDR adjusted p	Partial η²	raw p	FDR adjusted p	Partial η²
Glutamic acid	7.14643e-05	0.00265717	0.0350144	5.40745e-07	6.48894e-05	0.0551713	0.0395437	0.590377	0.00953023
Docosahexaenoic acid	0.0274946	0.15326	0.0109218	6.20259e-06	0.000372155	0.0451081	0.406987	0.876069	0.00155266
L-Alanine	0.550662	0.804758	0.000804495	2.10982e-05	0.000843929	0.0400514	0.0894914	0.608115	0.00649519
Eicosapentaenoic acid	0.00578888	0.0512906	0.0170615	4.35848e-05	0.00129013	0.0370552	0.629912	0.876069	0.000524562
Lactic acid	0.58236	0.804758	0.000683235	5.50864e-05	0.00129013	0.0360885	0.00123199	0.0739194	0.0233209
Dihomo-gamma-linolenic acid	0.0257138	0.15326	0.0111803	6.48249e-05	0.00129013	0.0354167	0.835358	0.963874	9.76119e-05
CE(20:5)	9.01095e-06	0.00108131	0.0435656	7.52578e-05	0.00129013	0.034801	0.458658	0.876069	0.00124029
Eicosadienoic acid	0.142019	0.39352	0.00486033	9.04743e-05	0.00135711	0.0340414	0.824908	0.961058	0.000110606
CE(20:3)	0.000225431	0.00381541	0.0302806	0.000330059	0.00402746	0.0287132	0.543886	0.876069	0.000832161
Choline	0.491494	0.767865	0.00106893	0.000335622	0.00402746	0.0286445	0.3431	0.876069	0.00202915
CE(22:6(4Z,7Z,10Z,13Z,16Z,19Z))	0.00504778	0.0512906	0.0176108	0.00133273	0.0143005	0.0230005	0.522386	0.876069	0.000924271
CE(20:4)	0.00517861	0.0512906	0.0175081	0.00143005	0.0143005	0.0227135	0.681987	0.876711	0.000379357
Aminoadipic acid	0.0316978	0.163073	0.0103746	0.00207161	0.0181541	0.0212068	0.198699	0.876069	0.00372617
Serine	0.818431	0.911979	0.000119087	0.00211798	0.0181541	0.021117	0.721803	0.891998	0.000286448
CE(18:3)	0.00025436	0.00381541	0.029784	0.00229497	0.0183597	0.0207915	0.95125	0.971159	8.44696e-06
Arachidonic acid	0.415577	0.695692	0.00149671	0.0028503	0.0213772	0.019914	0.576602	0.876069	0.000704296
CE(14:1)	0.0199189	0.140604	0.0121716	0.00337451	0.02382	0.0192319	0.439629	0.876069	0.0013488
Aconitic acid	0.737294	0.887355	0.000254248	0.0036195	0.02413	0.0189491	0.634327	0.876069	0.000511142
L-Aspartic acid	0.535167	0.79284	0.000868708	0.00454728	0.0287196	0.0180303	0.485267	0.876069	0.00109997
Cer(d18:1/18:0)	0.131273	0.39352	0.00513341	0.00558188	0.0334913	0.0172074	0.997703	0.997703	1.87349e-08
Methionine sulfoxide	0.563858	0.804758	0.000752413	0.00679358	0.0384116	0.0164213	0.731996	0.891998	0.000265019
CE(22:5)	0.0527565	0.226099	0.00844238	0.00704213	0.0384116	0.0162778	0.102694	0.648592	0.00600046
Cer(d18:0/24:1)	0.0236728	0.15326	0.0115004	0.00935614	0.0486137	0.0151463	0.239069	0.876069	0.00312746
Kynurenine	0.58345	0.804758	0.000679296	0.00972274	0.0486137	0.0149938	0.626723	0.876069	0.000534391
L-Cysteine	0.000127548	0.00265717	0.0326257	0.0117641	0.0563011	0.0142391	0.577037	0.876069	0.000702689
CE(16:0)	0.00412997	0.0495596	0.0184176	0.0124579	0.0563011	0.0140127	0.261183	0.876069	0.00284899
CE(16:1)	3.07917e-05	0.0018475	0.0384899	0.0131369	0.0563011	0.0138034	0.32953	0.876069	0.00214626
SM C16:1	0.00293089	0.0390785	0.0198013	0.0193933	0.0705212	0.0122759	0.521238	0.876069	0.000929381
Trimethylamine N-oxide	0.244764	0.537698	0.00305283	0.0400942	0.133647	0.00947771	8.45486e-05	0.0101458	0.0343208
Dehydroepiandrosterone sulfate	0.000109908	0.00265717	0.0332392	0.545907	0.696903	0.000823842	0.232987	0.876069	0.0032096
Indole-3-propionic acid	0.000132859	0.00265717	0.0324576	0.955421	0.96345	7.06184e-06	0.217782	0.876069	0.00342671
*FDR - false discovery ratio

## Sheet: Table 3
Supplementary Table 3 - The effects of atherosclerosis and prediabetes and their interaction status on metabolite sums and ratios – summary of the two-way ANOVA results
Indicator	atherosclerosis status			prediabetes status			Interaction
	raw p	FDR adjusted p	Partial η²	raw p	FDR adjusted p	Partial η²	raw p	FDR adjusted p	Partial η²
GlutaminaseActivity	4.63457e-05	0.0101034	0.0368017	2.2009e-06	0.000239898	0.0493853	0.00401892	0.146021	0.0185273
CysSynthesis	0.000229822	0.0167873	0.0302012	3.66432e-05	0.00159764	0.0377715	0.802123	0.991471	0.000141912
PLA2Activity5	0.000231018	0.0167873	0.0301799	0.00271168	0.0268703	0.0201157	0.525218	0.883287	0.000911752
SumofPUFAPCs	0.000839464	0.033169	0.024887	3.17405e-05	0.00159764	0.0383646	0.52673	0.883287	0.000905115
PLA2Activity6	0.00102547	0.033169	0.0240694	0.00658079	0.0481339	0.0165484	0.984266	0.996675	8.78929e-07
PLA2Activity3	0.00177275	0.0388561	0.0218395	0.00620146	0.0481339	0.0167859	0.495655	0.883287	0.00104855
SumofPUFAPCOs	0.00178239	0.0388561	0.0218175	4.73696e-05	0.0017211	0.0367114	0.602419	0.921385	0.000613061
SumofVLCFACEs	0.002958	0.0391411	0.0197641	0.00308499	0.0292403	0.0195942	0.459306	0.883287	0.00123672
PLA2Activity1	0.00472329	0.0499734	0.0178777	0.00125707	0.0171276	0.0232387	0.996675	0.996675	3.92393e-08
SumofVLCFADHCer	0.00490114	0.0499734	0.0177292	0.00684473	0.0481339	0.0163913	0.274303	0.883287	0.00269715
SumofDHCer	0.00490114	0.0499734	0.0177292	0.00684473	0.0481339	0.0163913	0.274303	0.883287	0.00269715
SumofCEs	0.0026837	0.0391411	0.0201577	0.0113925	0.0636295	0.0143659	0.636639	0.925248	0.000504201
SumofSulfurContainingAAs	0.00302788	0.0391411	0.0196697	0.0142134	0.0718813	0.0134933	0.587202	0.921385	0.000665845
SumofLCFACEs	0.00305229	0.0391411	0.0196372	0.0130313	0.0692882	0.0138353	0.647212	0.929854	0.000473182
PLA2Activity4	0.00457953	0.0499734	0.0180019	0.0138568	0.0718813	0.0135933	0.183057	0.852112	0.00399793
SumofPUFACEs	0.00504319	0.0499734	0.0176145	0.00828391	0.0515969	0.0156303	0.39458	0.883287	0.00163658
SumofPCs	0.0121627	0.0895728	0.0141074	0.000553127	0.00918705	0.0265946	0.849933	0.993664	8.08959e-05
SumofUFAPCs	0.0123265	0.0895728	0.0140546	0.000566331	0.00918705	0.0264979	0.840817	0.993664	9.11599e-05
SumofPCOs	0.0162899	0.10791	0.0129578	0.000604554	0.00918705	0.0262303	0.902677	0.995326	3.37901e-05
SumofUFAPCOs	0.0164727	0.10791	0.0129141	0.000617897	0.00918705	0.0261409	0.893734	0.995326	4.03242e-05
SumofSFAPCs	0.0237414	0.132709	0.0114892	0.0018698	0.0195332	0.021623	0.608621	0.921385	0.000592338
GABASynthesis	0.0251988	0.132991	0.0112585	0.000536352	0.00918705	0.0267208	0.46839	0.883287	0.00118748
SumofSFAPCOs	0.029928	0.14828	0.0105953	0.00188164	0.0195332	0.0215973	0.628866	0.925248	0.000527774
SumofCholineLipids	0.033615	0.154783	0.0101497	0.00160697	0.0193325	0.0222387	0.944914	0.996675	1.07889e-05
SumofLPCOs	0.0336436	0.154783	0.0101464	0.00168495	0.0193325	0.022046	0.940185	0.996675	1.27244e-05
SumofCarboxylicAcids	0.566935	0.789229	0.000740603	0.000200115	0.00484724	0.0307708	0.00346745	0.146021	0.0191223
GlutaminolysisRate	0.853844	0.93298	7.66874e-05	5.67001e-05	0.0017658	0.0359693	0.0010358	0.146021	0.0240284
RatioofPUFALPCstoSFALPCs	0.000514118	0.0280194	0.0268944	0.202791	0.455757	0.00365918	0.779583	0.991471	0.000176985
RatioofUFALPCstoSFALPCs	0.00106506	0.033169	0.0239148	0.121	0.321682	0.00541878	0.745636	0.991471	0.000237791
SumofSteroidHormones	0.00177395	0.0388561	0.0218368	0.234168	0.495085	0.00319345	0.770293	0.991471	0.000192657
OTCDeficiencyNBS	0.00199817	0.0391411	0.0213533	0.302803	0.559415	0.00239669	0.183712	0.852112	0.00398601
CitSynthesis	0.00257508	0.0391411	0.0203249	0.283226	0.541608	0.00259897	0.169252	0.852112	0.00426107
SumofMUFACEs	0.00294428	0.0391411	0.0197828	0.117993	0.321682	0.00550739	0.849161	0.993664	8.17413e-05
SumofVLCFASMs	0.0672378	0.248438	0.00754023	0.00510754	0.0412386	0.0175636	0.326695	0.883287	0.00217154
PKUNBS	0.105159	0.337127	0.00661646	0.00143467	0.0183975	0.0253635	0.848713	0.993664	9.20047e-05
PLA2Activity2	0.118915	0.370336	0.00547996	0.00437795	0.0381757	0.0181829	0.264402	0.883287	0.00281087
SumofPUFAs	0.123354	0.370693	0.00535108	0.000632136	0.00918705	0.0260476	0.702407	0.981569	0.000329843
IDOActivity	0.160903	0.467346	0.00443244	0.00494061	0.0412386	0.017697	0.765451	0.991471	0.000201111
RatioofSGAtoHexose	0.214867	0.532284	0.00347041	7.87831e-06	0.000572491	0.0441204	0.635417	0.925248	0.000507863
SumofMeasuredw3FAs	0.28113	0.601853	0.00262168	0.000100371	0.0027351	0.0336134	0.4485	0.883287	0.00129733
MetOxidation	0.284362	0.601853	0.00258676	0.00731632	0.0498424	0.0161253	0.501361	0.883287	0.00102107
RatioofSGtoHexose	0.296357	0.615294	0.0024614	3.07995e-08	6.71429e-06	0.0669343	0.540268	0.899072	0.000847196
SumofAromaticAAs	0.943975	0.973859	1.11605e-05	0.00322678	0.0293099	0.0194126	0.839324	0.993664	9.29019e-05
*FDR - false discovery ratio

## Sheet: Table 4
Supplementary Table 4 – Enriched KEGG Metabolic Pathways Associated with preclinical atherosclerosis.
Metabolite Set	Total Cmpd	Hits	Statistic Q	Expected Q	Enrichment ratio	Raw p	Holm p	FDR
Glutathione metabolism	28	5	1.6411	0.22422	7.31915	1.1893e-05	0.00042816	0.00042816
Steroid biosynthesis	41	1	3.7901	0.22422	16.9035	3.4092e-05	0.0011932	0.00061366
Thiamine metabolism	7	1	3.2155	0.22422	14.3408	0.00013812	0.0046962	0.0016575
Butanoate metabolism	15	2	1.8367	0.22422	8.19151	0.00028177	0.0092984	0.0022199
Nitrogen metabolism	6	2	1.7943	0.22422	8.00241	0.00030832	0.0098663	0.0022199
Taurine and hypotaurine metabolism	8	2	1.8303	0.22422	8.16296	0.00045693	0.014165	0.0023612
Steroid hormone biosynthesis	87	3	1.3768	0.22422	6.1404	0.00045913	0.014165	0.0023612
Porphyrin metabolism	31	2	1.6473	0.22422	7.3468	0.00086442	0.025068	0.0038899
Histidine metabolism	16	4	0.96289	0.22422	4.2944	0.0022291	0.062414	0.0089163
Arginine and proline metabolism	36	7	0.81079	0.22422	3.61605	0.00252	0.06804	0.009072
Arginine biosynthesis	14	6	0.90705	0.22422	4.04536	0.0030963	0.080504	0.0097187
Alanine, aspartate and glutamate metabolism	28	6	0.84496	0.22422	3.76844	0.0032396	0.08099	0.0097187
Pantothenate and CoA biosynthesis	20	4	0.94603	0.22422	4.2192	0.0047137	0.11313	0.013053
Cysteine and methionine metabolism	33	4	0.87038	0.22422	3.88181	0.0073543	0.16915	0.018911
Glyoxylate and dicarboxylate metabolism	31	4	0.90228	0.22422	4.02408	0.0085513	0.18813	0.020523
Biosynthesis of unsaturated fatty acids	36	4	0.9776	0.22422	4.36	0.010587	0.22233	0.023821
Glycine, serine and threonine metabolism	33	7	0.51307	0.22422	2.28824	0.040735	0.8147	0.086262
Purine metabolism	70	3	0.57637	0.22422	2.57056	0.055248	1	0.1105
Lysine degradation	30	3	0.53199	0.22422	2.37263	0.074892	1	0.1419
Biotin metabolism	10	1	0.47815	0.22422	2.1325	0.1444	1	0.25992
Propanoate metabolism	21	1	0.41027	0.22422	1.82977	0.17644	1	0.30246
Pyrimidine metabolism	39	2	0.35653	0.22422	1.59009	0.20187	1	0.33033
Glycerophospholipid metabolism	36	2	0.29198	0.22422	1.3022	0.27018	1	0.42289
beta-Alanine metabolism	21	3	0.23279	0.22422	1.03822	0.3707	1	0.55604
Arachidonic acid metabolism	44	1	0.14659	0.22422	0.653778	0.41937	1	0.60389
Phenylalanine metabolism	8	1	0.11853	0.22422	0.528633	0.4678	1	0.62373
Phenylalanine, tyrosine and tryptophan biosynthesis	4	1	0.11853	0.22422	0.528633	0.4678	1	0.62373
Nicotinate and nicotinamide metabolism	15	1	0.085214	0.22422	0.380046	0.53817	1	0.69194
Selenocompound metabolism	20	1	0.076749	0.22422	0.342293	0.55909	1	0.69405
Tryptophan metabolism	41	3	0.13772	0.22422	0.614218	0.5961	1	0.71532
Valine, leucine and isoleucine degradation	39	3	0.050768	0.22422	0.22642	0.71931	1	0.83533
Primary bile acid biosynthesis	46	5	0.10854	0.22422	0.484078	0.74304	1	0.83592
D-Amino acid metabolism	15	1	0.011654	0.22422	0.0519757	0.81995	1	0.86638
Sphingolipid metabolism	32	1	0.011654	0.22422	0.0519757	0.81995	1	0.86638
Lipoic acid metabolism	28	1	0.0089029	0.22422	0.0397061	0.84231	1	0.86638
Valine, leucine and isoleucine biosynthesis	8	4	0.03823	0.22422	0.170502	0.8813	1	0.8813

## Sheet: Table 5
Supplementary Table 45– Enriched KEGG Metabolic Pathways associated with prediabetes.
Metabolite Set	Total Cmpd	Hits	Statistic Q	Expected Q	Enrichment ratio	Raw p	Holm p	FDR
Biosynthesis of unsaturated fatty acids	36	4	3.8158	0.22422	17.0181	9.2214e-08	3.3197e-06	2.7177e-06
Alanine, aspartate and glutamate metabolism	28	6	2.1521	0.22422	9.59816	1.5098e-07	5.2844e-06	2.7177e-06
Histidine metabolism	16	4	2.1712	0.22422	9.68335	2.7253e-07	9.2661e-06	2.8799e-06
Butanoate metabolism	15	2	3.3597	0.22422	14.9839	3.1998e-07	1.0559e-05	2.8799e-06
Nitrogen metabolism	6	2	3.1676	0.22422	14.1272	5.4422e-07	1.7415e-05	3.9184e-06
Porphyrin metabolism	31	2	3.3588	0.22422	14.9799	8.4333e-07	2.6143e-05	5.06e-06
Glutathione metabolism	28	5	1.9241	0.22422	8.5813	1.4966e-06	4.4899e-05	7.6969e-06
Glyoxylate and dicarboxylate metabolism	31	4	2.2083	0.22422	9.84881	9.9529e-06	0.00028863	4.4788e-05
Selenocompound metabolism	20	1	4.0537	0.22422	18.0791	1.7962e-05	0.00050294	7.1848e-05
Arginine biosynthesis	14	6	1.5684	0.22422	6.99492	3.5738e-05	0.00096492	0.00012866
Arginine and proline metabolism	36	7	1.1841	0.22422	5.28097	0.00010383	0.0026995	0.0003398
Glycine, serine and threonine metabolism	33	7	1.2022	0.22422	5.3617	0.00012142	0.0030355	0.00036427
Glycerophospholipid metabolism	36	2	1.6727	0.22422	7.46008	0.00073666	0.01768	0.00204
D-Amino acid metabolism	15	1	2.1156	0.22422	9.43538	0.0020494	0.047136	0.004635
Sphingolipid metabolism	32	1	2.1156	0.22422	9.43538	0.0020494	0.047136	0.004635
Arachidonic acid metabolism	44	1	2.0957	0.22422	9.34662	0.0021531	0.047136	0.004635
Pantothenate and CoA biosynthesis	20	4	1.0735	0.22422	4.78771	0.0021887	0.047136	0.004635
Cysteine and methionine metabolism	33	4	1.0372	0.22422	4.62581	0.0026612	0.050562	0.0053224
Thiamine metabolism	7	1	1.9548	0.22422	8.71822	0.0030535	0.054963	0.0055748
Steroid biosynthesis	41	1	1.9491	0.22422	8.6928	0.0030971	0.054963	0.0055748
Nicotinate and nicotinamide metabolism	15	1	1.8718	0.22422	8.34805	0.0037541	0.060066	0.0064357
Lysine degradation	30	3	1.0222	0.22422	4.55892	0.0057375	0.086063	0.0093887
Taurine and hypotaurine metabolism	8	2	1.0634	0.22422	4.74266	0.010098	0.14138	0.015806
beta-Alanine metabolism	21	3	0.63	0.22422	2.80974	0.040027	0.52035	0.06004
Tryptophan metabolism	41	3	0.52006	0.22422	2.31942	0.076585	0.91902	0.11028
Biotin metabolism	10	1	0.60164	0.22422	2.68326	0.10147	1	0.14049
Phenylalanine metabolism	8	1	0.54879	0.22422	2.44755	0.11782	1	0.15148
Phenylalanine, tyrosine and tryptophan biosynthesis	4	1	0.54879	0.22422	2.44755	0.11782	1	0.15148
Lipoic acid metabolism	28	1	0.38229	0.22422	1.70498	0.19195	1	0.23829
Valine, leucine and isoleucine biosynthesis	8	4	0.34509	0.22422	1.53907	0.20058	1	0.2407
Valine, leucine and isoleucine degradation	39	3	0.28425	0.22422	1.26773	0.2564	1	0.29775
Purine metabolism	70	3	0.14977	0.22422	0.66796	0.56419	1	0.63471
Primary bile acid biosynthesis	46	5	0.12145	0.22422	0.541656	0.69793	1	0.76138
Propanoate metabolism	21	1	0.013416	0.22422	0.0598341	0.80707	1	0.85454
Steroid hormone biosynthesis	87	3	0.056375	0.22422	0.251427	0.85848	1	0.88301
Pyrimidine metabolism	39	2	0.0067089	0.22422	0.0299211	0.96951	1	0.96951

## Sheet: Table 6
Supplementary Table 6– Enriched SMPDB Metabolic Pathways linked with preclinical atherosclerosis.
Metabolite Set	Total Cmpd	Hits	Statistic Q	Expected Q	Enrichment ratio	Raw p	Holm p	FDR
Cysteine Metabolism	26	2	3.2506	0.22422	14.4974	2.8633e-06	0.00016321	0.00016321
Glutathione Metabolism	20	4	1.6467	0.22422	7.34413	4.6961e-05	0.0026298	0.0013384
Androgen and Estrogen Metabolism	33	1	3.311	0.22422	14.7667	0.00010944	0.0060191	0.0015746
Folate Metabolism	29	1	3.2858	0.22422	14.6544	0.00011637	0.0062837	0.0015746
Pantothenate and CoA Biosynthesis	21	1	3.2155	0.22422	14.3408	0.00013812	0.0073205	0.0015746
Glutamate Metabolism	48	7	1.0518	0.22422	4.69093	0.00028141	0.014633	0.0021968
Amino Sugar Metabolism	33	2	1.7943	0.22422	8.00241	0.00030832	0.015724	0.0021968
Nicotinate and Nicotinamide Metabolism	35	2	1.7943	0.22422	8.00241	0.00030832	0.015724	0.0021968
Taurine and Hypotaurine Metabolism	12	2	1.8303	0.22422	8.16296	0.00045693	0.02239	0.0028939
Tyrosine Metabolism	70	2	1.6855	0.22422	7.51717	0.0008761	0.042053	0.0045398
Malate-Aspartate Shuttle	10	2	1.6855	0.22422	7.51717	0.0008761	0.042053	0.0045398
Phenylalanine and Tyrosine Metabolism	27	2	1.7022	0.22422	7.59165	0.0010485	0.048231	0.0046317
Glucose-Alanine Cycle	13	2	1.6813	0.22422	7.49844	0.0010564	0.048231	0.0046317
Lysine Degradation	30	3	1.592	0.22422	7.10017	0.0011624	0.051147	0.0047328
Arachidonic Acid Metabolism	67	3	1.1441	0.22422	5.10258	0.0017782	0.076463	0.0067572
Warburg Effect	57	3	1.2177	0.22422	5.43083	0.0020167	0.084702	0.0071845
Purine Metabolism	73	6	0.8515	0.22422	3.79761	0.0021646	0.088748	0.0072577
Alanine Metabolism	17	3	1.1238	0.22422	5.01204	0.0028293	0.11317	0.0089593
Propanoate Metabolism	42	3	1.2564	0.22422	5.60343	0.0033378	0.13017	0.0098095
Beta-Alanine Metabolism	34	5	0.85236	0.22422	3.80145	0.0034419	0.13079	0.0098095
Glycine and Serine Metabolism	59	12	0.73412	0.22422	3.27411	0.0038662	0.14305	0.010494
Homocysteine Degradation	9	3	1.1073	0.22422	4.93845	0.0043061	0.15502	0.011157
Urea Cycle	28	7	0.78844	0.22422	3.51637	0.0054974	0.19241	0.013624
Aspartate Metabolism	35	7	0.73271	0.22422	3.26782	0.0069012	0.23464	0.01639
Arginine and Proline Metabolism	52	8	0.67572	0.22422	3.01365	0.0074709	0.24654	0.017034
Histidine Metabolism	42	5	0.84229	0.22422	3.75653	0.0085229	0.27273	0.018685
Tryptophan Metabolism	59	5	0.75514	0.22422	3.36785	0.0088931	0.27569	0.018774
Alpha Linolenic Acid and Linoleic Acid Metabolism	17	4	0.9776	0.22422	4.36	0.010587	0.31761	0.021552
Ammonia Recycling	31	7	0.68983	0.22422	3.07658	0.012577	0.36473	0.02472
Valine, Leucine and Isoleucine Degradation	59	4	0.85952	0.22422	3.83338	0.029205	0.81773	0.055489
Spermidine and Spermine Biosynthesis	18	3	0.61832	0.22422	2.75765	0.046257	1	0.085053
Methionine Metabolism	42	10	0.39595	0.22422	1.7659	0.085382	1	0.15209
Biotin Metabolism	8	1	0.47815	0.22422	2.1325	0.1444	1	0.24941
Steroidogenesis	43	2	0.40967	0.22422	1.82709	0.16056	1	0.26918
Phosphatidylinositol Phosphate Metabolism	17	1	0.37085	0.22422	1.65396	0.19876	1	0.31962
Pyrimidine Metabolism	57	2	0.35653	0.22422	1.59009	0.20187	1	0.31962
Phenylacetate Metabolism	9	1	0.30279	0.22422	1.35041	0.24563	1	0.37841
Sphingolipid Metabolism	40	2	0.2581	0.22422	1.1511	0.31697	1	0.47545
Methylhistidine Metabolism	4	2	0.24027	0.22422	1.07158	0.3432	1	0.5016
Steroid Biosynthesis	48	1	0.15961	0.22422	0.711846	0.39943	1	0.56918
Carnitine Synthesis	22	3	0.19761	0.22422	0.881322	0.44861	1	0.62367
Fatty acid Metabolism	43	1	0.1058	0.22422	0.471858	0.49275	1	0.64412
Mitochondrial Beta-Oxidation of Short Chain Saturated Fatty Acids	27	1	0.1058	0.22422	0.471858	0.49275	1	0.64412
Phosphatidylcholine Biosynthesis	14	1	0.10363	0.22422	0.46218	0.49722	1	0.64412
Catecholamine Biosynthesis	20	1	0.094845	0.22422	0.423	0.51605	1	0.65366
Beta Oxidation of Very Long Chain Fatty Acids	17	2	0.10417	0.22422	0.464588	0.54752	1	0.67845
Bile Acid Biosynthesis	65	9	0.16878	0.22422	0.752743	0.58647	1	0.68939
Pyruvate Metabolism	47	1	0.064379	0.22422	0.287124	0.59263	1	0.68939
Gluconeogenesis	33	1	0.064379	0.22422	0.287124	0.59263	1	0.68939
Mitochondrial Beta-Oxidation of Long Chain Saturated Fatty Acids	28	2	0.08138	0.22422	0.362947	0.69136	1	0.78816
Oxidation of Branched Chain Fatty Acids	26	3	0.081935	0.22422	0.365422	0.72379	1	0.80894
Phospholipid Biosynthesis	29	2	0.057198	0.22422	0.255098	0.76694	1	0.83169
Phosphatidylethanolamine Biosynthesis	12	2	0.057642	0.22422	0.257078	0.77333	1	0.83169
Betaine Metabolism	21	4	0.092215	0.22422	0.41127	0.78925	1	0.8331
Selenoamino Acid Metabolism	27	2	0.044201	0.22422	0.197132	0.82134	1	0.85121
Porphyrin Metabolism	40	1	0.0089029	0.22422	0.0397061	0.84231	1	0.85735
Threonine and 2-Oxobutanoate Degradation	20	1	0.00061445	0.22422	0.00274039	0.95832	1	0.95832

## Sheet: Table 7
Supplementary Table 7 - Enriched SMPDB Metabolitc Pathways connected with prediabetes.
Metabolite Set	Total Cmpd	Hits	Statistic Q	Expected Q	Enrichment ratio	Raw p	Holm p	FDR
Glucose-Alanine Cycle	13	2	5.1945	0.22422	23.167	2.188e-09	1.2472e-07	6.4952e-08
Glutathione Metabolism	20	4	3.1815	0.22422	14.1892	3.0524e-09	1.7093e-07	6.4952e-08
Alanine Metabolism	17	3	3.5904	0.22422	16.0128	3.4185e-09	1.8802e-07	6.4952e-08
Arachidonic Acid Metabolism	67	3	3.095	0.22422	13.8034	1.107e-08	5.9778e-07	1.5775e-07
Glutamate Metabolism	48	7	2.1403	0.22422	9.54554	1.9587e-08	1.0381e-06	2.2329e-07
Folate Metabolism	29	1	6.3353	0.22422	28.2548	6.9016e-08	3.5888e-06	4.743e-07
Warburg Effect	57	3	3.2259	0.22422	14.3872	7.4849e-08	3.8173e-06	4.743e-07
Tyrosine Metabolism	70	2	4.1036	0.22422	18.3017	7.489e-08	3.8173e-06	4.743e-07
Malate-Aspartate Shuttle	10	2	4.1036	0.22422	18.3017	7.489e-08	3.8173e-06	4.743e-07
Alpha Linolenic Acid and Linoleic Acid Metabolism	17	4	3.8158	0.22422	17.0181	9.2214e-08	4.4263e-06	4.9394e-07
Cysteine Metabolism	26	2	4.1451	0.22422	18.4868	1.0073e-07	4.7343e-06	4.9394e-07
Tryptophan Metabolism	59	5	2.3898	0.22422	10.6583	1.0399e-07	4.7835e-06	4.9394e-07
Amino Sugar Metabolism	33	2	3.1676	0.22422	14.1272	5.4422e-07	2.449e-05	2.2157e-06
Nicotinate and Nicotinamide Metabolism	35	2	3.1676	0.22422	14.1272	5.4422e-07	2.449e-05	2.2157e-06
Selenoamino Acid Metabolism	27	2	3.0846	0.22422	13.757	9.0631e-07	3.8971e-05	3.444e-06
Urea Cycle	28	7	1.9235	0.22422	8.57863	1.7286e-06	7.26e-05	6.0663e-06
Phenylalanine and Tyrosine Metabolism	27	2	3.442	0.22422	15.351	1.8092e-06	7.4179e-05	6.0663e-06
Beta-Alanine Metabolism	34	5	1.7396	0.22422	7.75845	2.8999e-06	0.000116	9.1832e-06
Lysine Degradation	30	3	3.1292	0.22422	13.9559	3.2015e-06	0.00012486	9.6046e-06
Purine Metabolism	73	6	1.5065	0.22422	6.71885	7.0959e-06	0.00026965	2.0223e-05
Glycine and Serine Metabolism	59	12	1.4266	0.22422	6.3625	1.0081e-05	0.00037301	2.7364e-05
Phosphatidylethanolamine Biosynthesis	12	2	2.5327	0.22422	11.2956	1.2227e-05	0.00044018	3.168e-05
Ammonia Recycling	31	7	1.5682	0.22422	6.99402	2.3437e-05	0.00082029	5.8083e-05
Propanoate Metabolism	42	3	2.2676	0.22422	10.1133	4.9294e-05	0.001676	0.00011393
Arginine and Proline Metabolism	52	8	1.2355	0.22422	5.51021	4.9971e-05	0.001676	0.00011393
Aspartate Metabolism	35	7	1.2907	0.22422	5.7564	9.4781e-05	0.003033	0.00020395
Pyruvate Metabolism	47	1	3.3424	0.22422	14.9068	0.00010136	0.0031422	0.00020395
Gluconeogenesis	33	1	3.3424	0.22422	14.9068	0.00010136	0.0031422	0.00020395
Sphingolipid Metabolism	40	2	2.0241	0.22422	9.02729	0.00010376	0.0031422	0.00020395
Methionine Metabolism	42	10	0.99614	0.22422	4.44269	0.00023212	0.0064994	0.00044103
Phosphatidylcholine Biosynthesis	14	1	2.9499	0.22422	13.1563	0.00026406	0.0071296	0.00048552
Histidine Metabolism	42	5	1.4103	0.22422	6.2898	0.00033113	0.0086095	0.00058983
Homocysteine Degradation	9	3	1.382	0.22422	6.16359	0.0011355	0.028388	0.0019613
Valine, Leucine and Isoleucine Degradation	59	4	1.797	0.22422	8.01445	0.0012344	0.029625	0.0020694
Phospholipid Biosynthesis	29	2	1.4759	0.22422	6.58237	0.0022481	0.051706	0.0036612
Pantothenate and CoA Biosynthesis	21	1	1.9548	0.22422	8.71822	0.0030535	0.067177	0.0048347
Betaine Metabolism	21	4	0.86552	0.22422	3.86014	0.0062846	0.13198	0.0096818
Taurine and Hypotaurine Metabolism	12	2	1.0634	0.22422	4.74266	0.010098	0.20197	0.015148
Phosphatidylinositol Phosphate Metabolism	17	1	0.90198	0.22422	4.02275	0.044765	0.85053	0.065425
Steroid Biosynthesis	48	1	0.69713	0.22422	3.10913	0.077831	1	0.11091
Biotin Metabolism	8	1	0.60164	0.22422	2.68326	0.10147	1	0.14106
Threonine and 2-Oxobutanoate Degradation	20	1	0.52762	0.22422	2.35314	0.12516	1	0.16986
Oxidation of Branched Chain Fatty Acids	26	3	0.39975	0.22422	1.78285	0.15792	1	0.20933
Porphyrin Metabolism	40	1	0.38229	0.22422	1.70498	0.19195	1	0.24867
Carnitine Synthesis	22	3	0.33277	0.22422	1.48412	0.21639	1	0.27409
Spermidine and Spermine Biosynthesis	18	3	0.31694	0.22422	1.41352	0.23342	1	0.28924
Methylhistidine Metabolism	4	2	0.23885	0.22422	1.06525	0.34539	1	0.41887
Beta Oxidation of Very Long Chain Fatty Acids	17	2	0.18177	0.22422	0.810677	0.38534	1	0.45759
Bile Acid Biosynthesis	65	9	0.17531	0.22422	0.781866	0.56206	1	0.64108
Catecholamine Biosynthesis	20	1	0.075484	0.22422	0.336652	0.56235	1	0.64108
Steroidogenesis	43	2	0.083715	0.22422	0.373361	0.68541	1	0.76605
Mitochondrial Beta-Oxidation of Long Chain Saturated Fatty Acids	28	2	0.06329	0.22422	0.282267	0.75029	1	0.82244
Fatty acid Metabolism	43	1	0.01438	0.22422	0.0641334	0.8004	1	0.84487
Mitochondrial Beta-Oxidation of Short Chain Saturated Fatty Acids	27	1	0.01438	0.22422	0.0641334	0.8004	1	0.84487
Androgen and Estrogen Metabolism	33	1	0.0016959	0.22422	0.00756355	0.93081	1	0.96466
Pyrimidine Metabolism	57	2	0.0067089	0.22422	0.0299211	0.96951	1	0.98682
Phenylacetate Metabolism	9	1	1.6487e-06	0.22422	7.35305e-06	0.99784	1	0.99784
